# Supplementary material for: Contemporary predictors of death and sustained ventricular tachycardia in patients with repaired tetralogy of Fallot enrolled in the INDICATOR cohort
Source: HighWire-hosted journal article supplement (doi:10.1136/heartjnl-2013-304958), 2013-10-31
Supplement: heartjnl-2013-304958supp_table.pdf [file heartjnl-2013-304958supp_table.pdf]

**Table 1S: Comparison Between Patients With and Without RV Pressure Data**

| Demographic and Clinical Data                       | With RVp Data<br>(N = 315) | No RVp Data<br>(N = 558) | p value |
|-----------------------------------------------------|----------------------------|--------------------------|---------|
| Median age at repair (years)                        | 0.9 (0 – 57.2)             | 4.1 (0 – 45.3)           | <0.001  |
| Median age at CMR (years)                           | 18.1 (0.2 – 71.6)          | 27.9 (0.6 – 72.3)        | <0.001  |
| Time from repair to CMR (years)                     | 16 (0 – 49)                | 24 (0 – 58)              | <0.001  |
| Gender, male                                        | 177 (56%)                  | 302 (54%)                | 0.57    |
| Body surface area (m <sup>2</sup> )                 | 1.5±0.5                    | 1.8±0.4                  | <0.001  |
| Diagnosis                                           |                            |                          | <0.001  |
| Tetralogy of Fallot, pulmonary stenosis             | 235 (75%)                  | 490 (88%)                |         |
| Tetralogy of Fallot, pulmonary atresia              | 75 (24%)                   | 56 (10%)                 |         |
| Tetralogy of Fallot, AV canal                       | 5 (2%)                     | 12(2%)                   |         |
| Additional cardiovascular anomaly                   | 119 (38%)                  | 204 (37%)                | 0.77    |
| Non-cardiac anomalies                               | 52 (17%)                   | 145 (26%)                | 0.001   |
| Associated genetic disorder                         | 40 (13%)                   | 47(8%)                   | 0.05    |
| Prior palliative shunt                              | 91 (29%)                   | 223 (40%)                | 0.001   |
| Type of repair                                      |                            |                          | <0.001  |
| Transannular patch                                  | 185 (59%)                  | 257 (46%)                |         |
| RV-to-PA conduit                                    | 67 (21%)                   | 52(9%)                   |         |
| Non-transannular patch                              | 43 (14%)                   | 93 (17%)                 |         |
| Infundibular resection & pulmonary valvotomy        | 1(<1%)                     | 50 (9%)                  |         |
| Infundibular resection alone                        | 4 (1%)                     | 25(4%)                   |         |
| Pulmonary valvotomy alone                           | 6 (2%)                     | 22 (4%)                  |         |
| Other                                               | 9 (3%)                     | 59 (11%)                 |         |
| Subsequent revision of repair                       | 114 (36%)                  | 147 (26%)                | 0.003   |
| Pulmonary valve replacement                         | 168 (53%)                  | 147 (26%)                | <0.001  |
| Other cardiac procedure(s) (e.g., branch PA plasty) | 290 (92%)                  | 375 (67%)                | <0.001  |
| <b>Arrhythmia Data</b>                              |                            |                          |         |
| QRS duration, ms                                    | 142±29 (76 – 224)          | 147±27 (72 – 226)        | 0.01    |
| Atrial flutter                                      | 29 (9%)                    | 31(6%)                   | 0.05    |
| Atrial fibrillation                                 | 11 (3%)                    | 26 (5%)                  | 0.49    |
| Non-sustained ventricular tachycardia               | 35 (11%)                   | 46(8%)                   | 0.18    |
| Prior ablation                                      | 24 (8%)                    | 24 (4%)                  | 0.04    |
| Permanent pacemaker                                 | 6 (2%)                     | 7(1%)                    | 0.56    |
| Implantable defibrillator                           | 20 (6%)                    | 25 (4%)                  | 0.26    |
| <b>Exercise Data</b>                                |                            |                          |         |

|                                                    |               |               |        |
|----------------------------------------------------|---------------|---------------|--------|
| Peak oxygen consumption (mL/kg/min)                | 26 (8 – 53)   | 24 (2 – 46)   | <0.001 |
| Percent predicted peak oxygen consumption          | 70 (24 – 125) | 59 (18 – 160) | <0.001 |
| Ventilatory anaerobic threshold (mL/kg/min)        | 15 (6 – 33)   | 15 (6 – 44)   | 0.89   |
| <b>CMR Data</b>                                    |               |               |        |
| RV end-diastolic volume index (mL/m <sup>2</sup> ) | 160±52        | 147±47        | <0.001 |
| RV end-systolic volume index (mL/m <sup>2</sup> )  | 84±39         | 76±33         | <0.001 |
| RV ejection fraction (%)                           | 49±10         | 49±8          | 0.53   |
| RV mass index (g/m <sup>2</sup> )                  | 42±20         | 32±12         | <0.001 |
| RV mass/volume (g/mL)                              | 0.28±0.1      | 0.23±0.1      | <0.001 |
| Pulmonary regurgitation (%)                        | 40±16         | 32±17         | <0.001 |
| LV end-diastolic volume index (mL/m <sup>2</sup> ) | 84±23         | 87±21         | 0.12   |
| LV end-systolic volume index (mL/m <sup>2</sup> )  | 36±16         | 37±14         | 0.59   |
| LV ejection fraction (%)                           | 58±8          | 58±8          | 0.73   |
| LV mass index (g/m <sup>2</sup> )                  | 59±23         | 50±16         | <0.001 |
| LV mass/volume (g/mL)                              | 0.71±0.2      | 0.59±0.2      | <0.001 |
| RV/LV end-diastolic volume ratio                   | 2.0±0.7       | 1.8±0.6       | <0.001 |

Data are count (percentage), mean ± SD, or median (range).
